# Supplementary material for: SARS-CoV-2 Seroprevalence in Household Domestic Ferrets (Mustela putorius furo)
Source: PubMed Central journal article supplement (PMC8001492; doi:10.3390/ani11030667), 2021-03-02
Supplement: animals-11-00667-s001.pdf [file animals-11-00667-s001.pdf]

## Supplementary Materials

**Table S1.** Body weight, hematological and biochemical parameters determined to seropositive Scheme 2. ferrets (F 18 and F 31) in the medical check-ups before tested positive (a), the month tested positive (b) (F 18 and F 31) and during follow-ups (c) (F 18 and F 31) and (d) (F 18).

| Parameter                | F 18<br>April<br>(a) | F 18<br>June<br>(b) | F 18 Au-<br>gust (c) | F 18<br>October<br>(d) | F 31<br>March (a) | F 31<br>June<br>(b) | F 31<br>October<br>(c) | Reference<br>Range     |
|--------------------------|----------------------|---------------------|----------------------|------------------------|-------------------|---------------------|------------------------|------------------------|
| <u>Body weight (g)</u>   | 1380                 | 1430                | 1400                 | 1315                   | 1205              | 1180                | 1305                   | 900-1500               |
| <u>Haematology</u>       |                      |                     |                      |                        |                   |                     |                        |                        |
| WBC (K/ $\mu$ L)         | 9.76                 | 5.21                | 4.29                 | 8.72                   | 5.00              | 4.90                | 4.84                   | 2-10                   |
| Neutrophils (K/ $\mu$ L) | <b>7.15</b>          | 2.88                | 2.52                 | <b>5.99</b>            | 2.02              | 2.60                | 2.40                   | 0.62-3.30              |
| Lymphocytes (K/ $\mu$ L) | 1.59                 | 1.65                | 1.20                 | <b>0.97</b>            | 1,02              | 1.37                | 1.80                   | 1-8                    |
| Monocytes (K/ $\mu$ L)   | 0.78                 | 0.46                | 0.41                 | <b>1.43</b>            | 0.55              | 0.78                | 0.52                   | 0.18-0.90              |
| Eosinophils (K/ $\mu$ L) | 0.22                 | 0.21                | 0.15                 | 0.30                   | 0.37              | 0.12                | 0.10                   | 0.10-0.60              |
| Basophils (K/ $\mu$ L)   | 0.03                 | 0.01                | 0.01                 | 0.03                   | 0.05              | 0.03                | 0.03                   | 0.00-0.10              |
| RBC (M/ $\mu$ L)         | 10.07                | 8.14                | <b>12.01</b>         | 10.62                  | 8.59              | 8.05                | 10.16                  | 6.35-11.20             |
| Haematocrit (%)          | 50.7                 | 39.7                | <b>55.1</b>          | 52.3                   | 48.9              | 46.4                | 51.3                   | 37.0-55.0              |
| Haemoglobin (g/dL)       | <b>17.7</b>          | 16.5                | <b>19.3</b>          | 16.6                   | 16.9              | 16.0                | 17.0                   | 11.0-17.0              |
| MCV (fL)                 | 50.4                 | 48.8                | 45.9                 | 49.2                   | 51.05             | 54.0                | 50.5                   | 45.0-55.0              |
| MCH (pg)                 | 17.3                 | 17.3                | 16.1                 | 15.6                   | 17.2              | 18.0                | 18.0                   | 14.0-18.0              |
| MCHC (g/dL)              | 34.9                 | 23.8                | 35.01                | 33.10                  | 34.6              | 34.5                | 35.0                   | 32.0-35.0              |
| RDW (%)                  | 19.1                 | 19                  | <b>16.3</b>          | <b>16</b>              | 19.0              | 19.0                | 19.2                   | 19.0-25.0              |
| Platelets (K/ $\mu$ L)   | 650                  | 567                 | 525                  | 501                    | 326               | 344                 | 300                    | 270-880                |
| <u>Blood Chemistry</u>   |                      |                     |                      |                        |                   |                     |                        |                        |
| ALT (U/L)                | 83                   | 82                  | 85                   | 83                     | 85                | 51                  | 84                     | 82-289                 |
| ALKP (U/L)               | 11                   | 18                  | 17                   | 19                     | 28                | 18                  | 11                     | 9-84                   |
| Glu (mg/dL)              | 105                  | 128                 | 110                  | 107                    | 104               | 94                  | <b>79</b>              | 94-207                 |
| Crea (mg/dL)             | 0.9                  | 0.4                 | <b>0.3</b>           | 0.4                    | 0.9               | 0.4                 | 0.6                    | 0.4-0.9                |
| BUN (mg/dL)              | 28                   | 45                  | 21                   | 36                     | 23                | 27                  | 34                     | 10-45                  |
| Total protein (g/dL)     | 6.4                  | 6.5                 | 7.0                  | 6.1                    | 6.7               | 6.8                 | 7.6                    | 5.2-7.3                |
| Albumin (g/dL)           | 2.7                  | 2.6                 | 3.2                  | 2.8                    | 3.2               | 2.9                 | 0.4                    | 2.6-3.8                |
| Globulins (g/dL)         | <b>3.7</b>           | <b>3.8</b>          | <b>3.8</b>           | <b>3.2</b>             | <b>3.5</b>        | <b>3.9</b>          | <b>4.2</b>             | 1.8-3.1                |
| ELISA serology (OD)      | 0,079                | <b>0.285</b>        | nd                   | <b>0.285</b>           | nd                | <b>0.300</b>        | 0.059                  | Cutt-off: $\geq 0.250$ |

Abbreviations: ALB Albumin, ALT Alanine amino-transferase, ALKP Alkaline Phosphatase, BUN Blood Urea Nitrogen, Crea Creatinine ELISA Enzyme-Linked Immunosorbent Assay, GLOB Globulins, Glu Glucose, MCH Mean Corpuscular Haemoglobin, MCHC Mean Corpuscular Haemoglobin Concentration, MCV Mean Corpuscular Volume, RBC Red Blood Count, RDW Red Blood Cell Distribution Width, TP Total Protein concentrations, WBC White Blood Count, nd not determined. Abnormalities are highlighted in bold.
